# Supplementary material for: Supervised binary classification methods for strawberry ripeness discrimination from bioimpedance data
Source: PubMed Central journal article supplement (PMC8160339; doi:10.1038/s41598-021-90471-5), 2021-05-27
Supplement: 41598_2021_90471_MOESM1_ESM.pdf [file 41598_2021_90471_MOESM1_ESM.pdf]

# Appendix I

## Bootstrap F-Score Validation and Selected Hyperparameters

| LR  | Selection For: | Feature Nr. | Mean F1 | Mean F05 | Mean F2 | H1 - Lambda        | H2 - Regularization | H3                   | H4                    |
|-----|----------------|-------------|---------|----------|---------|--------------------|---------------------|----------------------|-----------------------|
|     | F1 Score       | 18          | 0.637   | 0.755    | 0.551   | 2.11E-05           | 'ridge'             | -                    | -                     |
|     |                | 8           | 0.630   | 0.759    | 0.539   | 2.11E-05           | 'ridge'             | -                    | -                     |
|     |                | 10          | 0.636   | 0.760    | 0.546   | 1.87E-06           | 'ridge'             | -                    | -                     |
|     | F0.5 Score     | 13          | 0.636   | 0.757    | 0.548   | 6.29E-06           | 'ridge'             | -                    | -                     |
|     |                | 18          | 0.633   | 0.754    | 0.546   | 7.10E-05           | 'ridge'             | -                    | -                     |
|     |                | 8           | 0.630   | 0.759    | 0.539   | 2.11E-05           | 'ridge'             | -                    | -                     |
|     |                | 10          | 0.636   | 0.760    | 0.546   | 1.87E-06           | 'ridge'             | -                    | -                     |
|     | F2 Score       | 13          | 0.636   | 0.757    | 0.548   | 6.29E-06           | 'ridge'             | -                    | -                     |
|     |                | 18          | 0.637   | 0.755    | 0.551   | 2.11E-05           | 'ridge'             | -                    | -                     |
|     |                | 8           | 0.630   | 0.759    | 0.539   | 2.11E-05           | 'ridge'             | -                    | -                     |
|     |                | 10          | 0.636   | 0.760    | 0.546   | 1.87E-06           | 'ridge'             | -                    | -                     |
|     |                | 13          | 0.636   | 0.757    | 0.548   | 6.29E-06           | 'ridge'             | -                    | -                     |
| DT  | Selection For: | Feature Nr. | Mean F1 | Mean F05 | Mean F2 | H1 - Min Leaf Size | H2 - Max Splits Nr. | H3 - Split Criterion | H4                    |
|     | F1 Score       | 18          | 0.6988  | 0.7540   | 0.6515  | 4                  | 680                 | 'deviance'           | -                     |
|     |                | 6           | 0.7149  | 0.7634   | 0.6724  | 2                  | 680                 | 'deviance'           | -                     |
|     |                | 9           | 0.5801  | 0.6870   | 0.5025  | 25                 | 37                  | 'deviance'           | -                     |
|     | F0.5 Score     | 12          | 0.7020  | 0.7564   | 0.6553  | 2                  | 37                  | 'deviance'           | -                     |
|     |                | 18          | 0.6131  | 0.7246   | 0.5320  | 1                  | 18                  | 'deviance'           | -                     |
|     |                | 6           | 0.6031  | 0.7215   | 0.5185  | 7                  | 18                  | 'deviance'           | -                     |
|     |                | 9           | 0.5801  | 0.6870   | 0.5025  | 25                 | 37                  | 'deviance'           | -                     |
|     | F2 Score       | 12          | 0.6069  | 0.7208   | 0.5246  | 7                  | 18                  | 'deviance'           | -                     |
|     |                | 18          | 0.6988  | 0.7540   | 0.6515  | 4                  | 680                 | 'deviance'           | -                     |
|     |                | 6           | 0.7149  | 0.7634   | 0.6724  | 2                  | 680                 | 'deviance'           | -                     |
|     |                | 9           | 0.6541  | 0.7299   | 0.5928  | 7                  | 329                 | 'gdi'                | -                     |
|     |                | 12          | 0.7020  | 0.7564   | 0.6553  | 2                  | 37                  | 'deviance'           | -                     |
| NBC | Selection For: | Feature Nr. | Mean F1 | Mean F05 | Mean F2 | H1 - Distribution  | H2 - Kernel         | H3 - Width           | H4                    |
|     | F1 Score       | 18          | 0.563   | 0.695    | 0.474   | 'kernel'           | 'normal'            | 0.1376               | -                     |
|     |                | 6           | 0.533   | 0.653    | 0.451   | 'kernel'           | 'box'               | 0.3235               | -                     |
|     |                | 9           | 0.553   | 0.664    | 0.473   | 'kernel'           | 'box'               | 0.1891               | -                     |
|     | F0.5 Score     | 12          | 0.567   | 0.697    | 0.477   | 'kernel'           | 'normal'            | 0.1891               | -                     |
|     |                | 18          | 0.486   | 0.680    | 0.378   | 'kernel'           | 'normal'            | 1.2758               | -                     |
|     |                | 6           | 0.533   | 0.653    | 0.451   | 'kernel'           | 'box'               | 0.3235               | -                     |
|     |                | 9           | 0.517   | 0.678    | 0.420   | 'kernel'           | 'triangle'          | 10.0642              | -                     |
|     | F2 Score       | 12          | 0.567   | 0.697    | 0.477   | 'kernel'           | 'normal'            | 0.1891               | -                     |
|     |                | 18          | 0.563   | 0.695    | 0.474   | 'kernel'           | 'normal'            | 0.1376               | -                     |
|     |                | 6           | 0.533   | 0.653    | 0.451   | 'kernel'           | 'box'               | 0.3235               | -                     |
|     |                | 9           | 0.553   | 0.664    | 0.473   | 'kernel'           | 'box'               | 0.1891               | -                     |
|     |                | 12          | 0.567   | 0.697    | 0.477   | 'kernel'           | 'normal'            | 0.1891               | -                     |
| KNN | Selection For: | Feature Nr. | Mean F1 | Mean F05 | Mean F2 | H1 - Nr. Neighbors | H2 - Distance       | H3 - Distance Weight | H4                    |
|     | F1 Score       | 18          | 0.754   | 0.847    | 0.681   | 93                 | 'euclidean'         | 'inverse'            | -                     |
|     |                | 8           | 0.772   | 0.847    | 0.710   | 13                 | 'mahalanobis'       | 'squaredinverse'     | -                     |
|     |                | 11          | 0.769   | 0.850    | 0.703   | 49                 | 'spearman'          | 'inverse'            | -                     |
|     | F0.5 Score     | 15          | 0.762   | 0.839    | 0.699   | 26                 | 'minkowski'         | 'squaredinverse'     | -                     |
|     |                | 18          | 0.737   | 0.858    | 0.647   | 93                 | 'mahalanobis'       | 'squaredinverse'     | -                     |
|     |                | 8           | 0.764   | 0.862    | 0.687   | 93                 | 'mahalanobis'       | 'squaredinverse'     | -                     |
|     |                | 11          | 0.765   | 0.857    | 0.691   | 341                | 'minkowski'         | 'squaredinverse'     | -                     |
|     | F2 Score       | 15          | 0.755   | 0.858    | 0.674   | 178                | 'cityblock'         | 'squaredinverse'     | -                     |
|     |                | 18          | 0.755   | 0.847    | 0.681   | 93                 | 'euclidean'         | 'inverse'            | -                     |
|     |                | 8           | 0.772   | 0.846    | 0.710   | 13                 | 'mahalanobis'       | 'squaredinverse'     | -                     |
|     |                | 11          | 0.770   | 0.851    | 0.703   | 49                 | 'spearman'          | 'inverse'            | -                     |
|     |                | 15          | 0.760   | 0.832    | 0.701   | 13                 | 'seuclidean'        | 'squaredinverse'     | -                     |
| SVM | Selection For: | Feature Nr. | Mean F1 | Mean F05 | Mean F2 | H1 - Kernel Scale  | H2 - Box Constraint | H3 - Kernel Function | H4 - Polynomial Order |
|     | F1 Score       | 18          | 0.640   | 0.756    | 0.555   | 1                  | 215.443             | 'linear'             | -                     |
|     |                | 6           | 0.671   | 0.788    | 0.585   | 1                  | 215.443             | 'polynomial'         | 2                     |
|     |                | 9           | 0.703   | 0.792    | 0.632   | 1                  | 215.443             | 'polynomial'         | 2                     |
|     | F0.5 Score     | 13          | 0.624   | 0.754    | 0.533   | 1                  | 2.154               | 'linear'             | -                     |
|     |                | 18          | 0.640   | 0.755    | 0.555   | 1                  | 215.443             | 'linear'             | -                     |
|     |                | 6           | 0.671   | 0.787    | 0.585   | 1                  | 215.443             | 'polynomial'         | 2                     |
|     |                | 9           | 0.623   | 0.753    | 0.532   | 1                  | 2.154               | 'linear'             | -                     |
|     | F2 Score       | 13          | 0.624   | 0.754    | 0.533   | 1                  | 2.154               | 'linear'             | -                     |
|     |                | 18          | 0.638   | 0.756    | 0.552   | 1                  | 46.416              | 'linear'             | -                     |
|     |                | 6           | 0.671   | 0.768    | 0.596   | 1                  | 1000                | 'polynomial'         | 2                     |
|     |                | 9           | 0.703   | 0.792    | 0.632   | 1                  | 215.443             | 'polynomial'         | 2                     |
|     |                | 13          | 0.739   | 0.805    | 0.683   | 1                  | 46.416              | 'polynomial'         | 2                     |

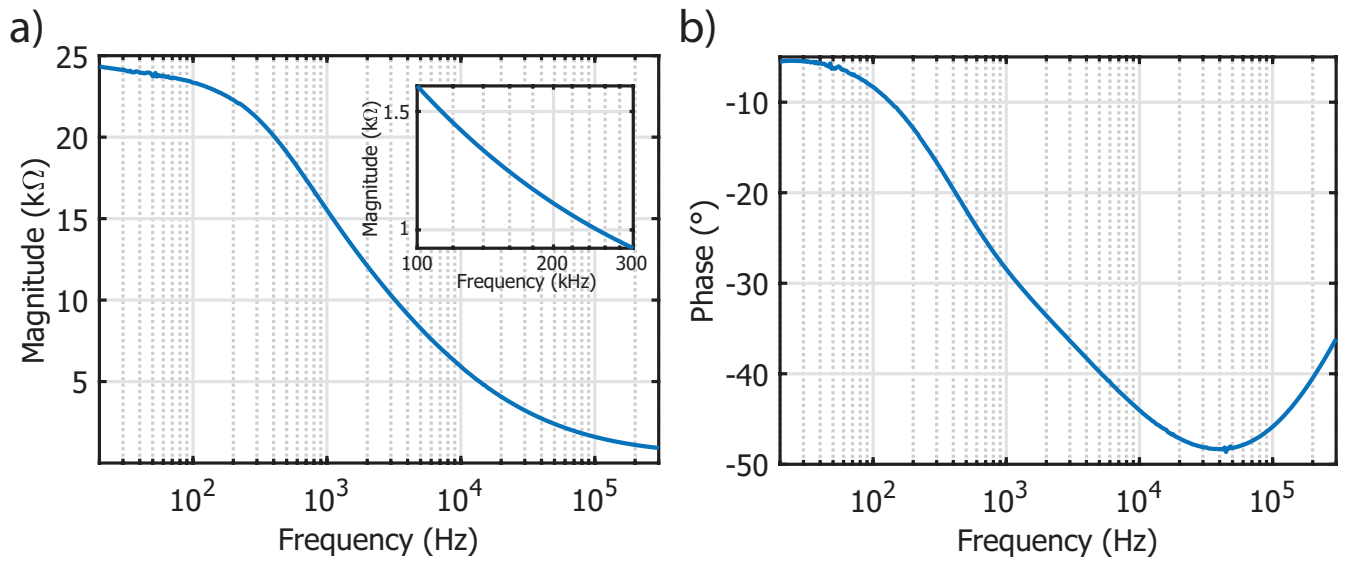

**Figure 1.** Single fruit magnitude (a) and phase (b) measurement example. Inset graph in (a) represents a magnification of the 100–300 kHz frequency points.
